# Supplementary material for: Loss of histone methyltransferase ASH1L in the developing mouse brain causes autistic-like behaviors
Source: PubMed Central journal article supplement (PMC8213741; doi:10.1038/s42003-021-02282-z), 2021-06-18
Supplement: 42003_2021_2282_MOESM2_ESM.pdf [file 42003_2021_2282_MOESM2_ESM.pdf]

## **Supplementary Information**

### **Loss of histone methyltransferase ASH1L in the developing mouse brain causes autistic-like behaviors**

Yuen Gao, Natalia Duque-Wilckens, Mohammad B Aljazi, Yan Wu,  
Adam J Moeser, George I Mias, Alfred J Robison, Jin He

Correspondence to: [hejin1@msu.edu](mailto:hejin1@msu.edu)

#### **This PDF file includes:**

Supplementary Figure 1 to 6  
Supplementary Table 1 to 3

Supplementary Figure 1. Characterization of *Ash1L* knockout mice.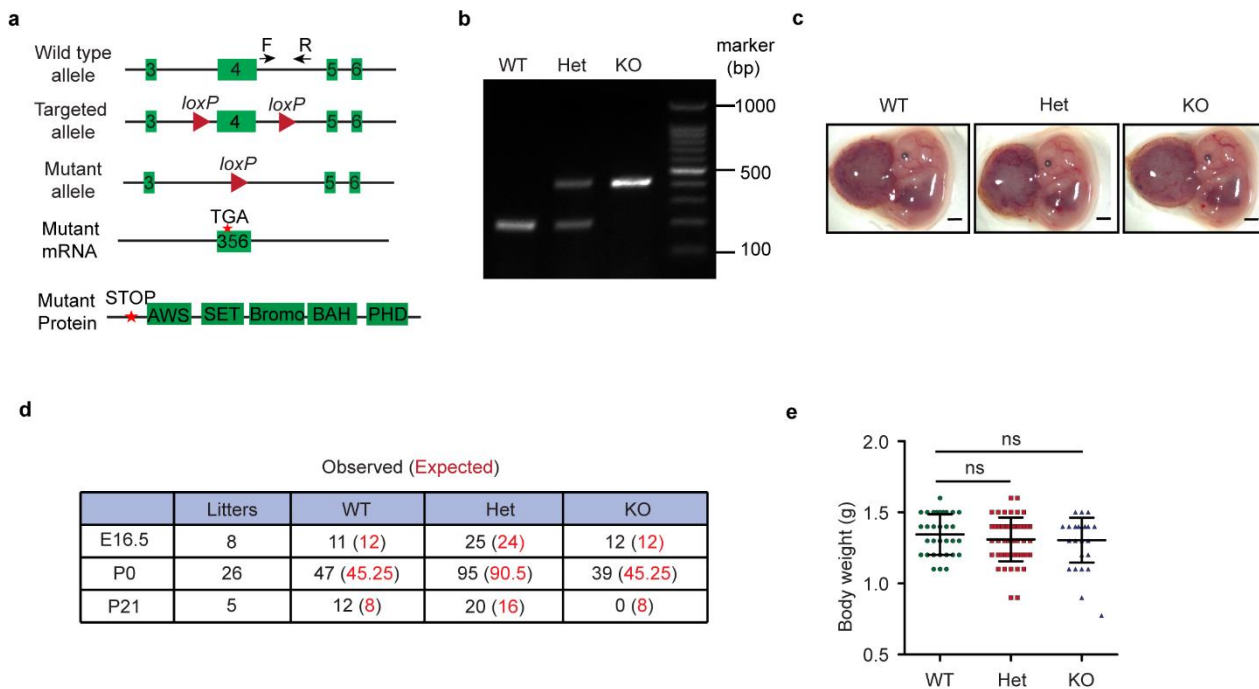

**(a)** Diagram showing the strategy for the generation of *Ash1L* conditional knockout mice. Cre-mediated deletion of exon 4 results in an altered spliced mRNA with a premature stop codon, which generates a truncated protein without all functional AWS, SET, Bromo, BAH and PHD domains. The arrows labeled as F and R represent the genotyping primers. **(b)** Genotyping results showing the PCR results of wild-type, heterozygous, and homozygous *Ash1L* knockout mice. **(c)** Photos showing the gross morphology of wild-type, heterozygous, and homozygous *Ash1L* knockout embryos and placentas at E13.5, bar = 500  $\mu\text{m}$ . **(d)** The genotyping results of global *Ash1L*-KO mice analyzed at embryonic and postnatal stages. **(e)** Body weight of global *Ash1L*-KO mice at P0. For *Ash1L* WT,  $n = 32$  mice; for *Ash1L* Het,  $n = 53$  mice; for *Ash1L* KO,  $n = 23$  mice.  $P$ -values calculated using a two-tailed  $t$  test. Error bars in graphs represent mean  $\pm$  SEM. Note: ns, not significant.

**Supplementary Figure 2. Loss of ASH1L delays embryonic and postnatal brain development.**

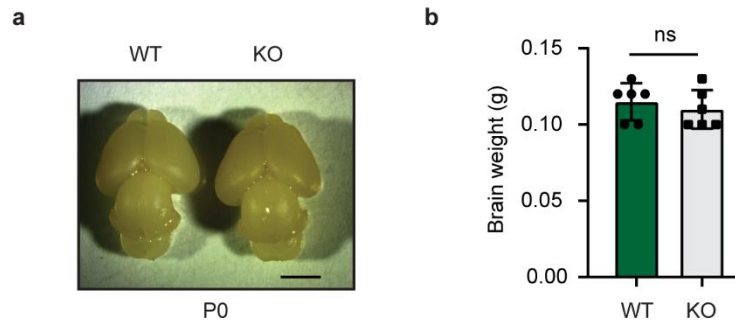

(a) Photo showing the gross brain morphology of wild-type and global *Ash1L*-KO mice at P0, bar = 2 mm. (b) The brain weight of P0 wild-type and global *Ash1L*-KO mice.  $n = 6$  mice/genotype.  $P$ -values calculated using a two-tailed  $t$  test. Error bars in graphs represent mean  $\pm$  SEM. Note: ns, not significant.

**Supplementary Figure 3. Isolation and differentiation of neural progenitor cells *in vitro*.**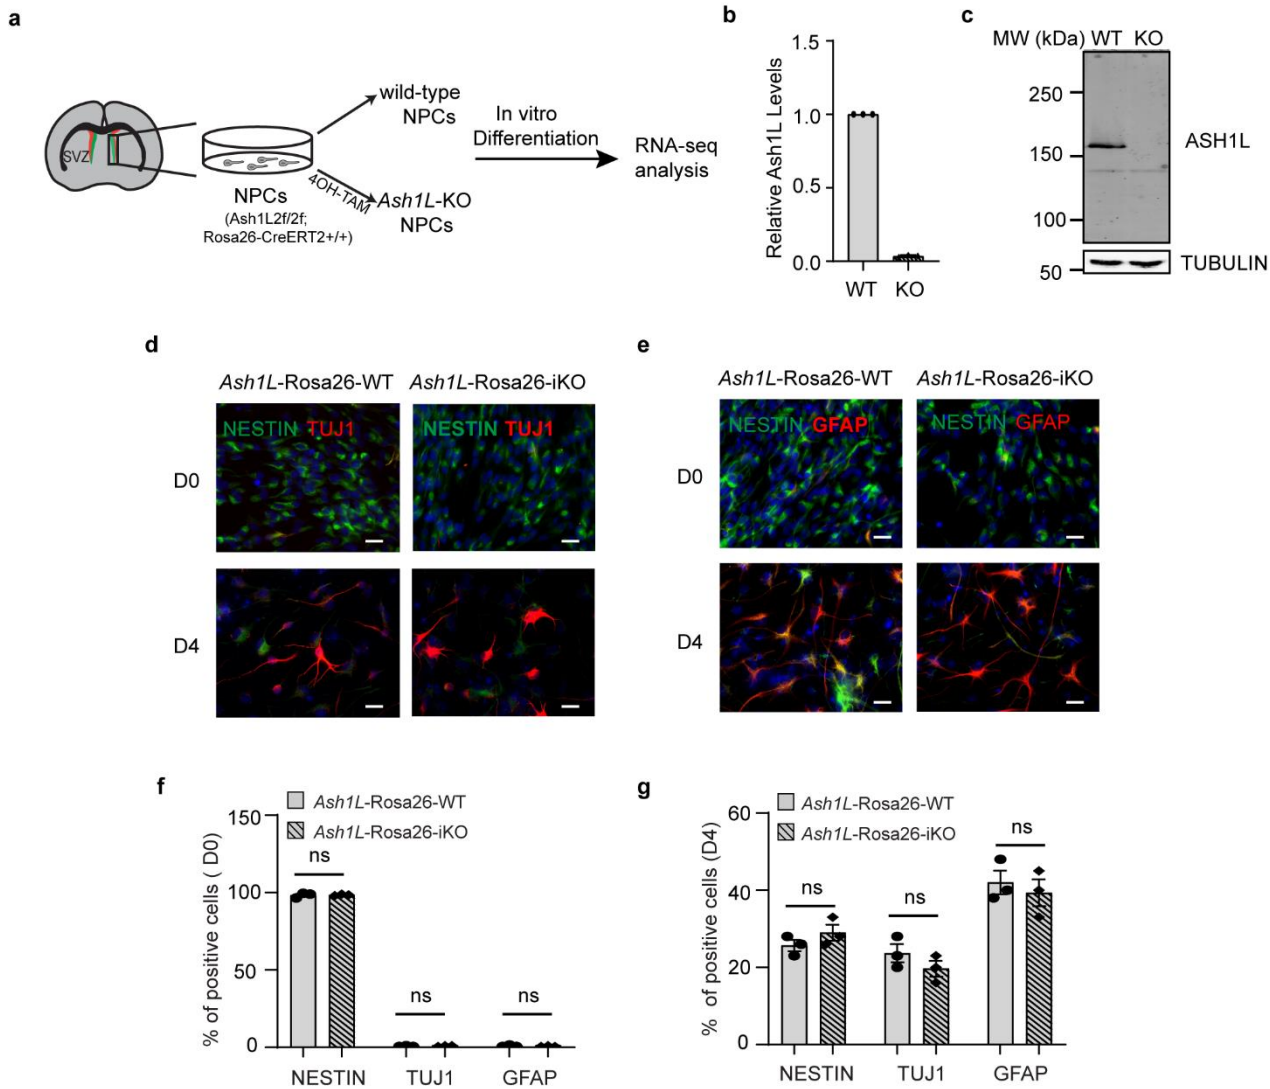

**(a)** Flowchart showing the experimental design for gene expression analysis. **(b)** qRT-PCR analysis showing the expression levels of *Ash1L* in wild-type and knockout NPCs. The results were normalized against levels of *Gapdh* and the expression level in wild-type NPCs was arbitrarily set to 1. The error bars represent mean  $\pm$  SEM,  $n = 3$  biologically independent samples/genotype. **(c)** Western blot analysis showing the protein levels of ASH1L in wild-type and knockout NPCs. **(d-e)** Photos showing the NESTIN<sup>+</sup>/TUJ1<sup>+</sup> (d) and NESTIN<sup>+</sup>/GFAP<sup>+</sup> cells (e) at D0 and D4 after induced differentiation, bar = 20  $\mu$ m. **(f-g)** Quantification of NESTIN<sup>+</sup>, TUJ1<sup>+</sup>, and GFAP<sup>+</sup> cells at D0 (f) and D4 (g) after induced differentiation. For each group,  $n = 3$  biologically independent samples/genotype.  $P$ -values calculated using a two-tailed  $t$  test. Error bars in graphs represent mean  $\pm$  SEM. Note: \* $p < 0.05$ ; \*\* $p < 0.01$ ; ns, not significant.

### Supplementary Figure 4. Loss of *ASH1L* impairs expression of genes critical for brain development.

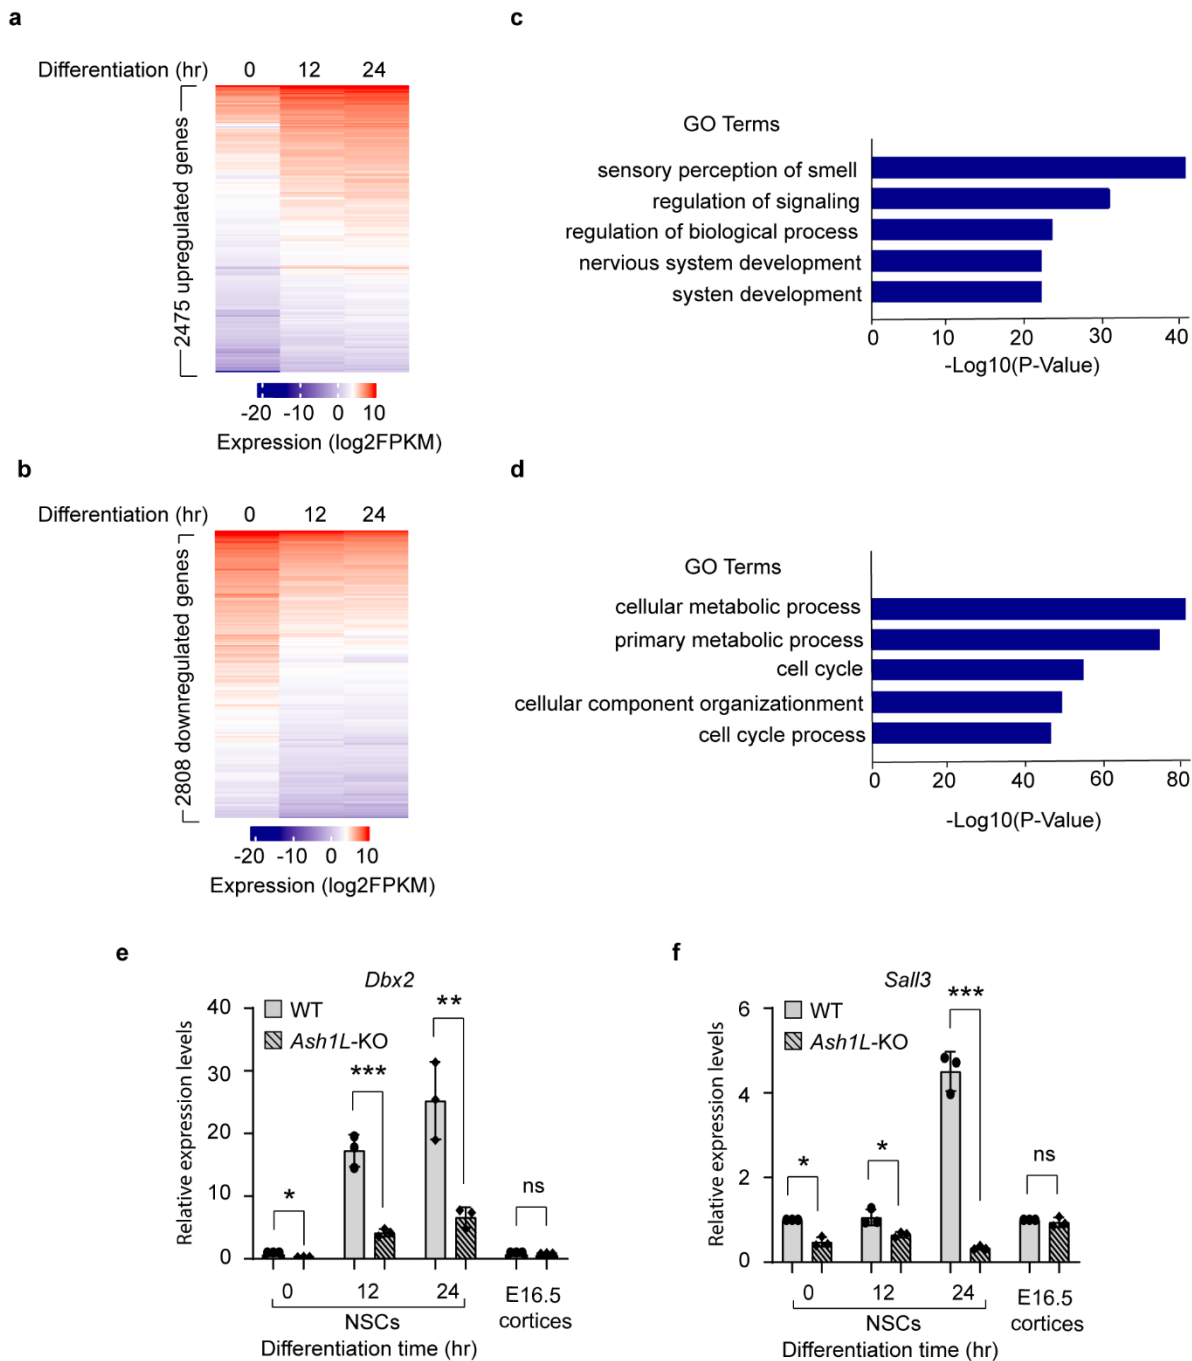

(a) Heatmap showing 2,475 upregulated genes in wild-type NPCs during induced differentiation (cutoff: change folds > 1.5,  $p < 0.01$ ). (b) Heatmap showing 2,808 downregulated genes in wild-type NPCs during induced differentiation (cutoff: change folds > 1.5,  $p < 0.01$ ). (c) Gene ontology enrichment analysis showing the enriched GO terms of 2,475 upregulated genes in the wild-type NPCs during induced differentiation (FDR < 0.05). (d) Gene ontology enrichment analysis showing the enriched GO terms of 2,808 downregulated genes in the wild-type NPCs during induced differentiation (FDR < 0.05). (e-f) qRT-PCR analysis showing the mRNA levels of *Dbx2* and *Sall3* in wild-type and *Ash1L*-KO NPCs at different time points of induced differentiation and in E16.5 cortices. The results of analysis in NPCs were normalized against levels of *Gapdh* and the

expression level of wild-type NPCs at differentiation time 0 was arbitrarily set to 1. The results of analysis in E16.5 cortices were normalized against levels of *Gapdh* and the expression level of wild-type cortices was arbitrarily set to 1. The error bars represent mean  $\pm$  SEM, n = 3 biologically independent samples/genotype. *P*-values calculated using a two-tailed *t* test. Note: \**P* < 0.05; \*\**P* < 0.01; \*\*\**P* < 0.001; ns, not significant.

**Supplementary Figure 5. Uncropped gel picture for Fig. S1b.**

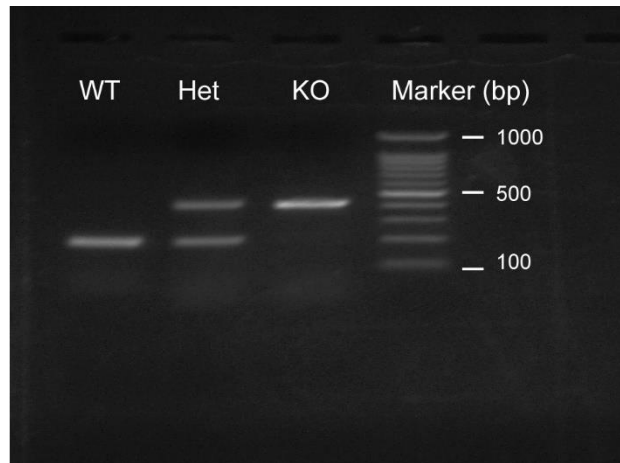

**Supplementary Figure 6. Uncropped gel pictures for Fig. S1c.**

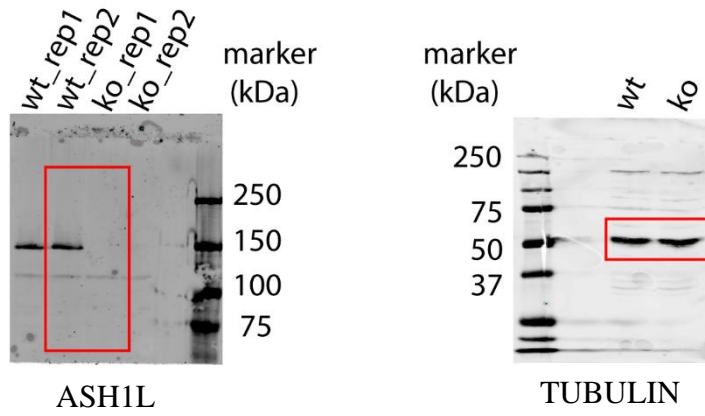



**Supplementary Table 1. Result of gene ontology enrichment analysis of 44 genes upregulated in the *Ash1L*-KO NPCs during induced differentiation.**

| <b>GO biological process complete</b>                              | <b>P-value</b> | <b>FDR</b> |
|--------------------------------------------------------------------|----------------|------------|
| regulation of developmental growth (GO:0048640)                    | 1.12E-04       | 4.53E-02   |
| regulation of cell migration (GO:0030336)                          | 1.71E-05       | 3.36E-02   |
| regulation of locomotion (GO:0040013)                              | 3.20E-06       | 5.04E-02   |
| regulation of cell motility (GO:2000146)                           | 2.19E-05       | 3.44E-02   |
| regulation of cellular component movement (GO:0051271)             | 2.58E-05       | 3.12E-02   |
| regulation of growth (GO:0045926)                                  | 1.49E-04       | 4.97E-02   |
| regulation of cell growth (GO:0001558)                             | 1.63E-05       | 3.67E-02   |
| chemotaxis (GO:0006935)                                            | 3.69E-05       | 3.63E-02   |
| plasma membrane bounded cell projection morphogenesis (GO:0120039) | 3.93E-05       | 3.10E-02   |
| taxis (GO:0042330)                                                 | 3.93E-05       | 2.95E-02   |
| cell projection morphogenesis (GO:0048858)                         | 4.24E-05       | 3.04E-02   |
| morphogenesis of an epithelium (GO:0002009)                        | 5.56E-05       | 3.24E-02   |
| cell part morphogenesis (GO:0032990)                               | 5.76E-05       | 3.13E-02   |
| tissue morphogenesis (GO:0048729)                                  | 2.21E-05       | 2.90E-02   |

**Supplementary Table 2. Result of gene ontology enrichment analysis of 70 genes down-regulated in the *Ash1L*-KO NPCs during induced differentiation.**

| <b>GO biological process complete</b>                      | <b>P-value</b> | <b>FDR</b> |
|------------------------------------------------------------|----------------|------------|
| telencephalon development (GO:0021537)                     | 1.18E-06       | 1.86E-02   |
| cellular process (GO:0009987)                              | 4.38E-06       | 3.45E-02   |
| exploration behavior (GO:0035640)                          | 4.83E-06       | 2.54E-02   |
| brain development (GO:0007420)                             | 5.46E-06       | 2.15E-02   |
| regulation of cell communication (GO:0010646)              | 7.46E-06       | 2.35E-02   |
| regulation of signaling (GO:0023051)                       | 7.97E-06       | 2.10E-02   |
| head development (GO:0060322)                              | 1.17E-05       | 2.64E-02   |
| locomotory behavior (GO:0007626)                           | 1.30E-05       | 2.56E-02   |
| animal organ development (GO:0048513)                      | 1.66E-05       | 2.92E-02   |
| central nervous system development (GO:0007417)            | 1.68E-05       | 2.66E-02   |
| synapse maturation (GO:0060074)                            | 2.76E-05       | 3.95E-02   |
| forebrain development (GO:0030900)                         | 2.95E-05       | 3.88E-02   |
| regulation of glucose transmembrane transport (GO:0010828) | 3.08E-05       | 3.74E-02   |
| purine ribonucleotide biosynthetic process (GO:0009152)    | 3.92E-05       | 4.42E-02   |

**Supplementary Table 3. Primers used in this study.**

| <b>Name</b>         | <b>Sequence (5'-3')</b>  | <b>Purpose</b> |
|---------------------|--------------------------|----------------|
| GAPDH-F             | GCAGTGGCAAAGTGGAGATT     | qRT-PCR        |
| GAPDH-R             | GAATTTGCCGTGAGTGGAGT     | qRT-PCR        |
| Ash1L-F             | CCCAGTCAGCTCCGATAAA      | qRT-PCR        |
| Ash1L-R             | CTGGAAGGAACTCCATTCCT     | qRT-PCR        |
| Dbx2-F              | AGGAGTCACAGGTGAAGATTTG   | qRT-PCR        |
| Dbx2-R              | AACTGTGCTGAAGCTGATCTC    | qRT-PCR        |
| Pcdh10-F            | AGGTGTATGTCCAAGCCAAG     | qRT-PCR        |
| Pcdh10-R            | ACTGTGCTGAAGCTGATCTC     | qRT-PCR        |
| Emx2-F              | CAGAAAGCCAAAGCGGATTC     | qRT-PCR        |
| Emx2-R              | CCCACCACGTAATGGTTCTT     | qRT-PCR        |
| Sall3-F             | TCCACTTTCAGAGGCACAAG     | qRT-PCR        |
| Sall3-R             | GGGCACATTGTCGAGGTATT     | qRT-PCR        |
| Foxg1-F             | AAGAACGGCAAGTACGAGAAG    | qRT-PCR        |
| Foxg1-R             | ATAGATGCCATTGAGCGTCAG    | qRT-PCR        |
| Nes-cre-F           | GCGGTCTGGCAGTAAAACTATC   | Genotyping     |
| Nes-cre-R           | GTGAAACAGCATTGCTGTCCTT   | Genotyping     |
| Ash1L-WT (floxed)-F | ACTAGCTTTGCTCTCATAAATGTC | Genotyping     |
| Ash1L-WT (floxed)-R | GGGTACATGGAGTTATTAGATCCT | Genotyping     |
| Ash1L-mut-F         | CCCACACAAATGTAAGTTTGGGA  | Genotyping     |
| Ash1L-mut-R         | ACATGGAGTTATTAGATCCTG    | Genotyping     |
