# Supplementary material for: Loss of histone methyltransferase ASH1L in the developing mouse brain causes autistic-like behaviors
Source: PubMed Central journal article supplement (PMC8213741; doi:10.1038/s42003-021-02282-z), 2021-06-18
Supplement: 42003_2021_2282_MOESM3_ESM.pdf [file 42003_2021_2282_MOESM3_ESM.pdf]

## Description of Additional Supplementary Files

**File name:** Supplementary Data 1

**Description:** Result of gene ontology enrichment analysis on the upregulated genes in the wild-type NPCs during induced differentiation.xlsx

**File name:** Supplementary Data 2

**Description:** Result of gene ontology enrichment analysis on the downregulated genes in the wild-type NPCs during induced differentiation.xlsx

**File name:** Supplementary Data 3

**Description:** Source data for graphs.xlsx

**File name:** Supplementary Movie 1

**Description:** Posture of wild-type mice upon tail suspension

**File name:** Supplementary Movie 2

**Description:** Mild paw clasping of *Ash1L*-Nes-cKO mice upon tail suspension

**File name:** Supplementary Movie 3

**Description:** Severe paw clasping of *Ash1L*-Nes-cKO mice upon tail suspension

**File name:** Supplementary Movie 4

**Description:** Hair grooming of wild-type mice

**File name:** Supplementary Movie 5

**Description:** Hair grooming of *Ash1L*-Nes-cKO mice
